# Supplementary material for: PET-RAFT to expand the surface-modification chemistry of melt coextruded nanofibers
Source: Royal Society of Chemistry journal article supplement (doi:10.1039/d2py01389d), 2023-01-01
Supplement: d2py01389d1.pdf [file d2py01389d1.pdf]

## Supporting Information

# **PET-RAFT to Expand Surface-Modification Chemistry of Melt Coextruded Nanofibers**

**Justin D. Hochberg, David M. Wirth, and Jonathan K. Pokorski\***

Department of NanoEngineering, University of California San Diego, Jacobs School of  
Engineering, La Jolla, California 92093, United States

Email Address: [jpokorski@ucsd.edu](mailto:jpokorski@ucsd.edu)

Phone Number: 858-246-3183

Address: 9500 Gilman Dr., SME Building 243J, La Jolla, California 92093, United States

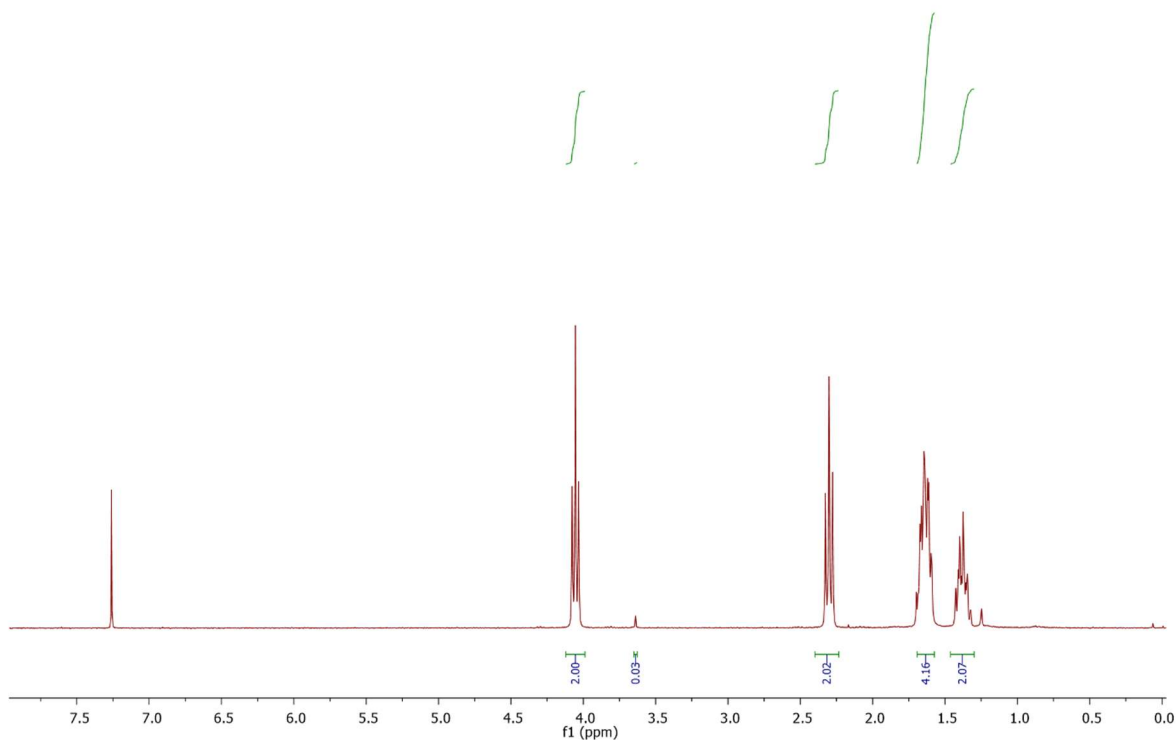

Figure S1. NMR of isolated PCL nanofibers. PCL:  $^1\text{H}$  NMR (300 MHz,  $\text{CDCl}_3$ ),  $\delta(\text{ppm})$ : 4.06 (2H, t), 2.30 (2H, t), 1.65 (4H, quint), 1.39 (2H, quint). PEO:  $^1\text{H}$  NMR (300 MHz,  $\text{CDCl}_3$ ),  $\delta(\text{ppm})$ : 3.64 (0.03H, s)

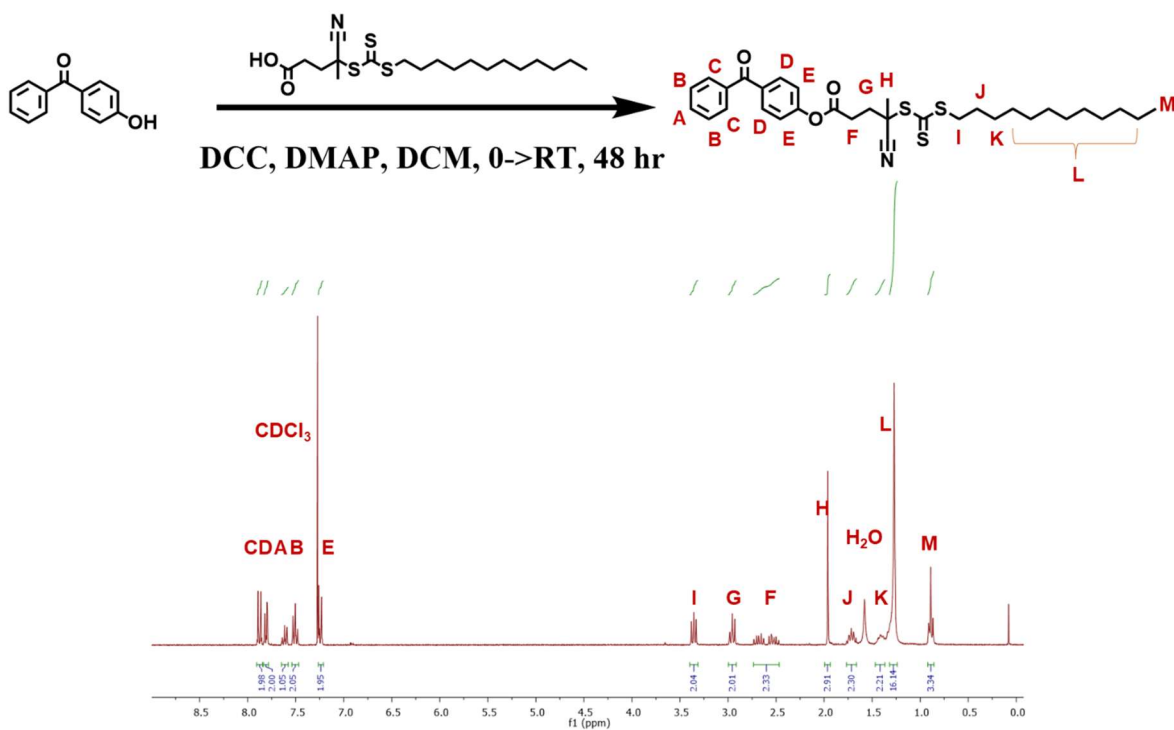

Figure S2. Synthesis of benz-CTA. (A) Chemical scheme of benz-CTA synthesis. (B)  $^1\text{H}$  NMR (300 MHz,  $\text{CDCl}_3$ ) of benz-CTA.
